# Supplementary material
Source: PubMed Central journal article supplement (PMC5987934)
Supplement: JCB705567_supplementary_material.pdf [file JCB705567_supplementary_material.pdf]

## ONLINE SUPPLEMENT

### **Pharmacologically Increasing Collateral Perfusion during Acute Stroke using a Carboxyhemoglobin Gas Transfer Agent (Sanguinate™) in Spontaneously Hypertensive Rats**

Marilyn J. Cipolla, PhD,<sup>1</sup> Italo Linfante, MD,<sup>2</sup> Abe Abuchowski, PhD<sup>3</sup>, Ronald Jubin, PhD<sup>3</sup>  
and Siu-Lung Chan, PhD<sup>1</sup>

<sup>1</sup>Department of Neurological Sciences and Pharmacology, University of Vermont College of  
Medicine, Burlington, VT

<sup>2</sup>Miami Cardiac and Vascular Institute and Neuroscience Center, Baptist Hospital, Miami, FL

<sup>3</sup>Prolong Pharmaceuticals, LLC, South Plainfield, NJ

Corresponding Author:

Marilyn J. Cipolla, PhD  
Department of Neurological Sciences  
University of Vermont  
149 Beaumont Ave.; HSRF 416A  
Burlington, VT 05405  
Phone: 802-656-9714; Fax: 802-656-8704  
Email: Marilyn.Cipolla@uvm.edu

## Supplemental Figures

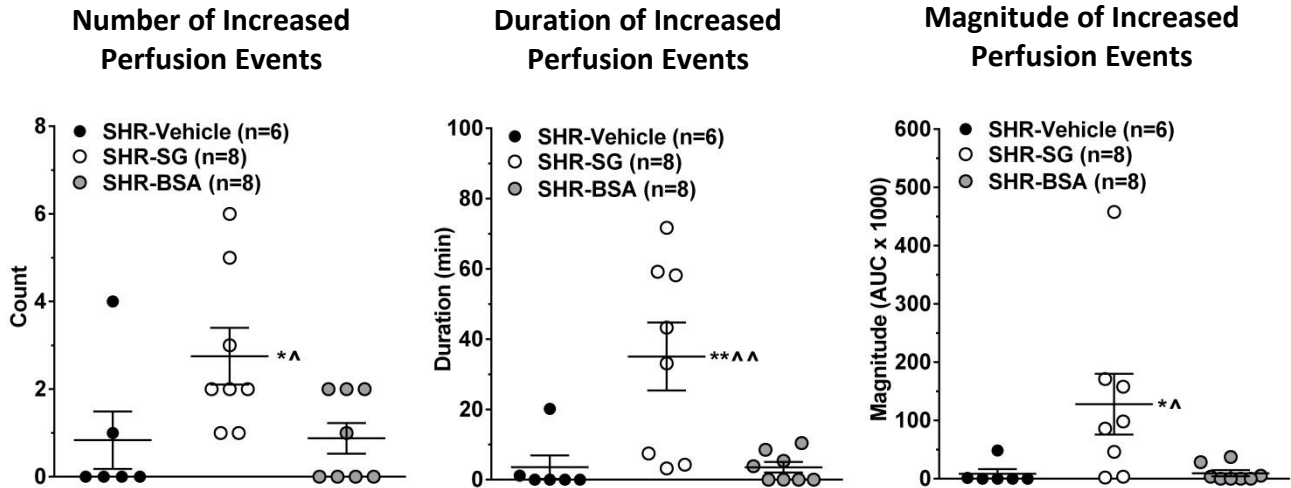

**Figure S1: Effect of SG and BSA on discrete increased collateral perfusion events.** BSA did not have an effect on the number, duration and magnitude of increased collateral perfusion events that were similar to vehicle-treated SHR. ^ p<0.05 vs. SHR-BSA; \* p<0.05 vs. SHR-vehicle; ^^p<0.01 vs. SHR-BSA; \*\*p<0.01 vs. SHR-vehicle.

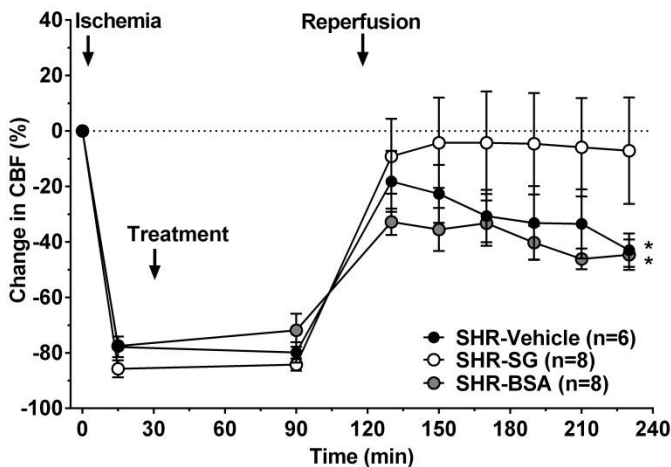

**Figure S2: Effect of SG and BSA on reperfusion CBF.** Graph showing change in core MCA CBF during ischemia and reperfusion in SHR treated with vehicle, SG or 5% BSA to raise blood pressure. Treatment with 5% BSA did not improve reperfusion that was similar to vehicle. \*p<0.05 vs. baseline by repeated measures ANOVA.

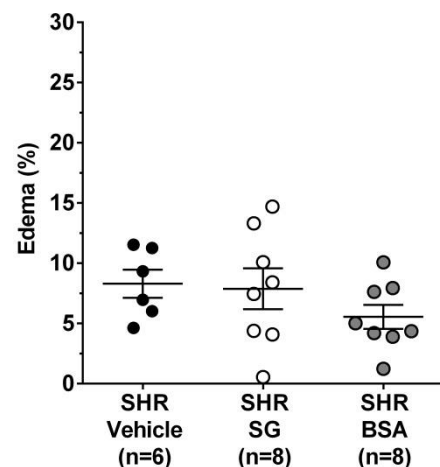

**Figure S3: Effect of early SG treatment and BSA on edema.** Graph showing edema measured off TTC-stained brain sections for SHR treated with vehicle, SG or 5% BSA after 30 minutes of ischemia. There was no difference between groups.

**Supplemental Table: Body weights, baseline mean arterial blood pressure and arterial blood gases of all animals during MCAO surgeries**

|                               | SHR<br>Early-<br>Veh | HSR<br>Early-<br>SG | SHR<br>Early-<br>BSA | SHR<br>Delayed-<br>Veh | SHR<br>Delayed-<br>SG |
|-------------------------------|----------------------|---------------------|----------------------|------------------------|-----------------------|
| n                             | 6                    | 8                   | 8                    | 6                      | 7                     |
| Age (weeks)                   | 16.7±0.3             | 17.1±0.3            | 17.0±0.2             | 16.7±0.3               | 16.9±0.3              |
| Weight (g)                    | 305±8                | 315±7               | 308±9                | 338±3                  | 341±3                 |
| Mean Arterial Pressure (mmHg) | 111±4                | 106±7               | 95±3                 | 105±4                  | 119±4                 |
| Arterial Blood Gases          |                      |                     |                      |                        |                       |
| Start                         |                      |                     |                      |                        |                       |
| pH                            | 7.36±0.01            | 7.39±0.02           | 7.40±0.01            | 7.37±0.03              | 7.37±0.03             |
| pCO <sub>2</sub> (mm Hg)      | 39.5±1.3             | 38.6 ± 1.7          | 38.5±1.5             | 37.3±3.2               | 36.8±2.1              |
| pO <sub>2</sub> (mm Hg)       | 126.0±10.8           | 110.5±7.5           | 114.1±6.7            | 113.8±4.0              | 109.7±5.1             |
| Middle                        |                      |                     |                      |                        |                       |
| pH                            | 7.34±0.01            | 7.39±0.01           | 7.38±0.01            | 7.36±0.02              | 7.37±0.02             |
| pCO <sub>2</sub> (mm Hg)      | 41.9±2.5             | 45.2±1.0            | 42.3±1.3             | 42.4±1.7               | 42.4±2.0              |
| pO <sub>2</sub> (mm Hg)       | 107.5±7.4            | 99.3±7.3            | 94.4±2.4             | 106.7±4.9              | 107.9±5.8             |
| End                           |                      |                     |                      |                        |                       |
| pH                            | 7.33±0.01            | 7.41±0.01           | 7.38±0.01            | 7.34±0.01              | 7.36±0.01             |
| pCO <sub>2</sub> (mm Hg)      | 44.0±1.7             | 42.7±1.0            | 40.6±1.3             | 42.4±1.0               | 42.4±1.7              |
| pO <sub>2</sub> (mm Hg)       | 104.5±7.7            | 105.3±6.3           | 96.5±2.7             | 104.5±6.9              | 96.6±4.4              |
| Body Temperature              |                      |                     |                      |                        |                       |
| Start (° C)                   | 36.9±0.1             | 36.9±0.1            | 36.9±0.1             | 37.0±0.1               | 36.8±0.1              |
| End (° C)                     | 36.8±0.1             | 36.7±0.2            | 36.9±0.1             | 37.0±0.1               | 37.0±0.1              |
